# Supplementary material for: Membrane manipulation by free fatty acids improves microbial plant polyphenol synthesis
Source: Springer Nature journal article supplement (doi:10.1038/s41467-023-40947-x), 2023-09-12
Supplement: MOESM3 [file 41467_2023_40947_MOESM3_ESM.pdf]

### Description of Additional Supplementary Files

File Name: Supplementary Movie 1

Description: Time course of the *C. glutamicum* model membrane simulation (0.5  $\mu$ s trajectory) with added RES. Colour code: dark grey POPG, light green DPPI, navy blue PODG, cyan (PO)MGDG, purple RES.

File Name: Supplementary Movie 2

Description: Time course of the *C. glutamicum* model membrane simulation (0.5  $\mu$ s trajectory) without RES. Colour code: dark grey POPG, light green DPPI, navy blue PODG, cyan (PO)MGDG.

File Name: Supplementary Movie 3

Description: Time course of the *C. glutamicum* model membrane simulation (0.5  $\mu$ s trajectory) with added RES and LA. Colour code: dark grey POPG, light green DPPI, navy blue PODG, cyan (PO)MGDG, purple RES, orange LA.

File Name: Supplementary Movie 4

Description: Time course of the *C. glutamicum* model membrane simulation (0.5  $\mu$ s trajectory) with added RES and LA. Colour code: dark grey POPG, light green DPPI, navy blue PODG, cyan (PO)MGDG. For more clarity, both RES and LA are not shown.
